# Supplementary material
Source: PubMed Central journal article supplement (PMC4975664)
Supplement: NIHMS777264-supplement-01.pdf [file NIHMS777264-supplement-01.pdf]

| <b>Supplemental Table 1. Unadjusted Associations of Demographic, Reproductive, Medical, and Lifestyle Factors with AMH for the Entire Cohort and for the Regularly Cycling Cohort</b> |                                        |                       |                                        |                       |
|---------------------------------------------------------------------------------------------------------------------------------------------------------------------------------------|----------------------------------------|-----------------------|----------------------------------------|-----------------------|
|                                                                                                                                                                                       | <b>Entire Cohort</b>                   |                       | <b>Regularly Cycling Cohort</b>        |                       |
| <b>Predictor</b>                                                                                                                                                                      | <b><math>\beta</math><br/>(95% CI)</b> | <b><i>P</i> value</b> | <b><math>\beta</math><br/>(95% CI)</b> | <b><i>P</i> value</b> |
| Age                                                                                                                                                                                   | -0.058 (-0.073, -0.042)                | <b>&lt;.0001</b>      | -0.041 (-0.061, -0.021)                | <b>&lt;.0001</b>      |
| Quadratic age                                                                                                                                                                         | -0.005 (-0.010, -0.001)                | <b>0.0291</b>         | -0.007 (-0.014, -0.001)                | <b>0.0181</b>         |
| Body mass index (BMI)                                                                                                                                                                 | -0.012 (-0.017, -0.006)                | <b>&lt;.0001</b>      | -0.018 (-0.025, -0.011)                | <b>&lt;.0001</b>      |
| Current hormonal<br>contraception (HC) use                                                                                                                                            | -0.234 (-0.354, -0.114)                | <b>0.0001</b>         | ---                                    | ---                   |
| History of abnormal<br>menstrual bleeding                                                                                                                                             | 0.207 (0.038, 0.376)                   | <b>0.0166</b>         | 0.014 (-0.230, 0.258)                  | 0.9102                |
| Menstrual cycle length in<br>the last 12 months <sup>a</sup><br>(Reference group:<br>25-35 days)                                                                                      | ---                                    | <b>0.0161</b>         | ---                                    | ---                   |
| <25 days                                                                                                                                                                              | -0.095 (-0.251, 0.061)                 | 0.2327                | ---                                    | ---                   |
| >35 days                                                                                                                                                                              | 0.294 (0.052, 0.535)                   | <b>0.0171</b>         | ---                                    | ---                   |
| History of a thyroid<br>condition                                                                                                                                                     | -0.434 (-0.754, -0.115)                | <b>0.0077</b>         | ---                                    | ---                   |
| History of seeking care for<br>difficulty conceiving                                                                                                                                  | 0.143 (-0.087, 0.372)                  | 0.2226                | 0.062 (-0.236, 0.360)                  | 0.6851                |
| Number of previous<br>pregnancies                                                                                                                                                     | -0.038 (-0.062, -0.013)                | <b>0.0025</b>         | -0.038 (-0.067, -0.009)                | <b>0.0102</b>         |
| Education                                                                                                                                                                             | ---                                    | <b>0.0394</b>         | ---                                    | 0.1209                |

|                                                               |                         |               |                         |               |
|---------------------------------------------------------------|-------------------------|---------------|-------------------------|---------------|
| (Reference group:<br>high school or less)                     |                         |               |                         |               |
| Some college                                                  | -0.001 (-0.145, 0.142)  | 0.9846        | 0.155 (-0.023, 0.332)   | 0.0869        |
| Associate or technical<br>degree                              | -0.003 (-0.193, 0.187)  | 0.9756        | 0.097 (-0.145, 0.339)   | 0.4303        |
| Bachelor's degree                                             | 0.094 (-0.072, 0.261)   | 0.2668        | 0.262 (0.057, 0.466)    | 0.0121        |
| Graduate degree                                               | -0.264 (-0.482, -0.046) | <b>0.0174</b> | 0.025 (-0.259, 0.308)   | 0.8651        |
| Household income<br><br>(Reference group:<br><\$20,000)       | ---                     | 0.0769        | ---                     | 0.4071        |
| \$20,001-50,000                                               | -0.033 (-0.152, 0.086)  | 0.5899        | 0.099 (-0.051, 0.248)   | 0.1949        |
| >\$50,000                                                     | -0.175 (-0.327, -0.023) | 0.0244        | 0.013 (-0.180, 0.206)   | 0.8952        |
| Marital status                                                | -0.053 (-0.174, 0.068)  | 0.3927        | -0.104 (-0.259, 0.051)  | 0.1860        |
| Pregnancy history<br><br>(Reference group:<br>never pregnant) | ---                     | 0.0637        | ---                     | <b>0.0098</b> |
| Previous pregnancy<br>without history of a live<br>birth      | -0.163 (-0.340, 0.013)  | 0.0701        | -0.047 (-0.261, 0.167)  | 0.6641        |
| Previous live birth but<br>without breastfeeding<br>history   | -0.167 (-0.323, -0.011) | 0.0354        | -0.189 (-0.379, 0.001)  | 0.0511        |
| Previous live birth with<br>history of<br>breastfeeding       | -0.168 (-0.303, 0.032)  | 0.0152        | -0.274 (-0.446, -0.103) | <b>0.0018</b> |

|                                                                                    |                        |        |                        |        |
|------------------------------------------------------------------------------------|------------------------|--------|------------------------|--------|
| Age at menarche                                                                    | 0.023 (-0.007, 0.053)  | 0.1366 | 0.028 (-0.012, 0.067)  | 0.1745 |
| Irregular menses in the last 12 months <sup>a</sup>                                | 0.006 (-0.135, 0.147)  | 0.9375 | ---                    | ---    |
| History of polycystic ovarian syndrome                                             | 0.187 (-0.121, 0.494)  | 0.2343 | ---                    | ---    |
| History of amenorrhea                                                              | -0.217 (-0.478, 0.055) | 0.1193 | ---                    | ---    |
| History of hormonal contraception use                                              | -0.141 (-0.295, 0.013) | 0.0725 | -0.049 (-0.208, 0.109) | 0.5402 |
| History of endometriosis                                                           | -0.086 (-0.495, 0.323) | 0.6813 | -0.170 (-0.853, 0.513) | 0.6248 |
| Current smoking                                                                    | 0.069 (-0.067, 0.205)  | 0.3200 | -0.061 (-0.223, 0.101) | 0.4583 |
| History of smoking                                                                 | 0.057 (-0.064, 0.178)  | 0.3565 | -0.053 (-0.201, 0.095) | 0.4811 |
| Frequency of alcohol consumption in the last 12 months<br>(Reference group: never) | ---                    | 0.7688 | ---                    | 0.1749 |
| Less than weekly                                                                   | -0.019 (-0.146, 0.108) | 0.7706 | -0.110 (-0.267, 0.047) | 0.1694 |
| At least weekly                                                                    | 0.03 (-0.115, 0.177)   | 0.6815 | 0.038 (-0.143, 0.220)  | 0.6797 |

<sup>a</sup>Among those not using hormonal contraception at any time in the last 12 months, n=953

**Supplemental Table 2. Age-Adjusted Associations of Demographic, Reproductive, Medical, and Lifestyle Factors with AMH in the Regularly Cycling Cohort**

| <b>Predictor</b>                                      | <b><math>\beta</math><br/>(95% CI)</b> | <b><i>P</i> value</b> |
|-------------------------------------------------------|----------------------------------------|-----------------------|
| Body mass index (BMI)                                 | -0.017 (-0.024, -0.010)                | <b>&lt;.0001</b>      |
| History of abnormal menstrual bleeding                | 0.009 (-0.231, 0.248)                  | 0.9428                |
| History of seeking care for difficulty conceiving     | 0.084 (-0.209, 0.378)                  | 0.5737                |
| Number of previous pregnancies                        | -0.024 (-0.055, 0.006)                 | 0.1175                |
| Education (Reference group: high school or less)      | ---                                    | 0.1766                |
| Some college                                          | 0.138 (-0.037, 0.312)                  | 0.1229                |
| Associate or technical degree                         | 0.114 (-0.125, 0.352)                  | 0.3491                |
| Bachelor's degree                                     | 0.256 (0.055, 0.457)                   | 0.0126                |
| Graduate degree                                       | 0.124 (-0.158, 0.407)                  | 0.3874                |
| Household income (Reference group: <\$20,000)         | ---                                    | 0.2109                |
| \$20,001-50,000                                       | 0.127 (-0.020, 0.274)                  | 0.0907                |
| >\$50,000                                             | 0.105 (-0.088, 0.299)                  | 0.2863                |
| Marital status                                        | -0.047 (-0.202, 0.108)                 | 0.5534                |
| Pregnancy history (Reference group: never pregnant)   | ---                                    | 0.0639                |
| Previous pregnancy without history of a live birth    | -0.027 (-0.239, 0.185)                 | 0.8024                |
| Previous live birth but without breastfeeding history | -0.129 (-0.324, 0.065)                 | 0.1919                |
| Previous live birth with history of breastfeeding     | -0.223 (-0.397, -0.049)                | 0.0122                |
| Age at menarche                                       | 0.030 (-0.009, 0.069)                  | 0.1350                |
| History of hormonal contraception use                 | 0.006 (-0.153, 0.165)                  | 0.9426                |
| History of endometriosis                              | -0.156 (-0.828, 0.516)                 | 0.6494                |
| Current smoking                                       | -0.088 (-0.248, 0.072)                 | 0.2786                |

|                                                                                    |                        |        |
|------------------------------------------------------------------------------------|------------------------|--------|
| History of smoking                                                                 | -0.073 (-0.218, 0.073) | 0.3277 |
| Frequency of alcohol consumption in the last 12 months<br>(Reference group: never) | ---                    | 0.2768 |
| Less than weekly                                                                   | -0.092 (-0.248, 0.063) | 0.2420 |
| At least weekly                                                                    | 0.034 (-0.145, 0.213)  | 0.7116 |
